# Supplementary material
Source: MDPI journal article supplement (https://www.mdpi.com/2073-4352/13/3/503)
Supplement: s1 [file s1]

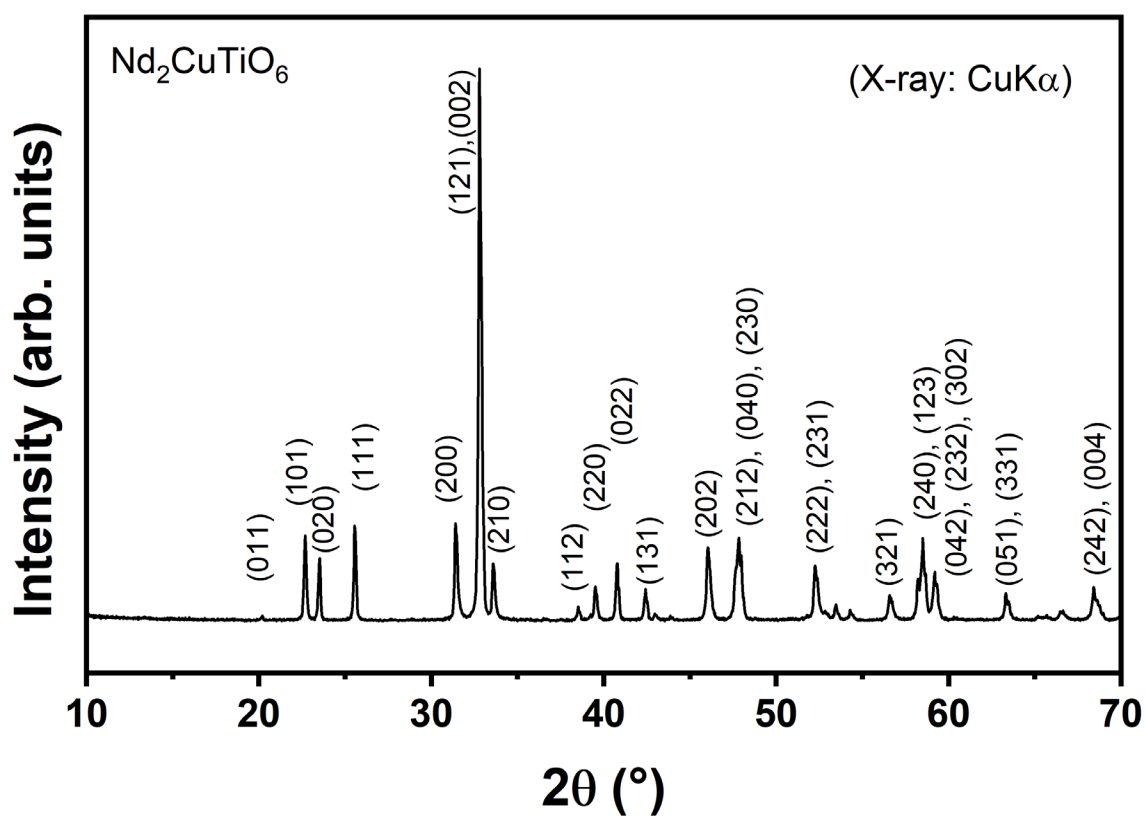

Figure-S1. Powder XRD pattern of prepared polycrystalline sample of  $\text{Nd}_2\text{CuTiO}_6$ . Miller indices for all the visible peaks are given.
